# Supplementary material
Source: PubMed Central journal article supplement (PMC4969442)
Supplement: ajtr0008-3056-f6.pdf [file ajtr0008-3056-f6.pdf]

MiR-122 inhibit bladder cancer growth and angiogenesis

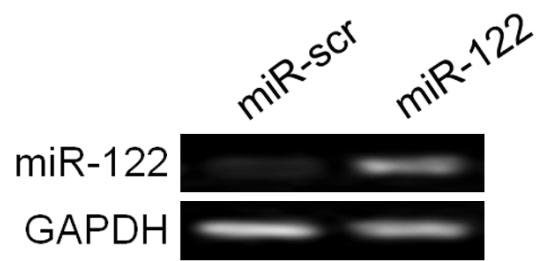

**Supplementary Figure 1.** The miR-122 expression levels were detected by semi-quantitative RT-PCR.
